# Supplementary material for: Inhibition of Microsomal Prostaglandin E Synthase-1 in Cancer-Associated Fibroblasts Suppresses Neuroblastoma Tumor Growth
Source: PubMed Central journal article supplement — eBioMedicine. 2018 May 24;32:84–92. doi: 10.1016/j.ebiom.2018.05.008 (PMC6021299; doi:10.1016/j.ebiom.2018.05.008), 2018-05-24
Supplement: mmc1.pdf [file mmc1.pdf]

## Supplementary figures and tables

### SK-N-AS xenograft

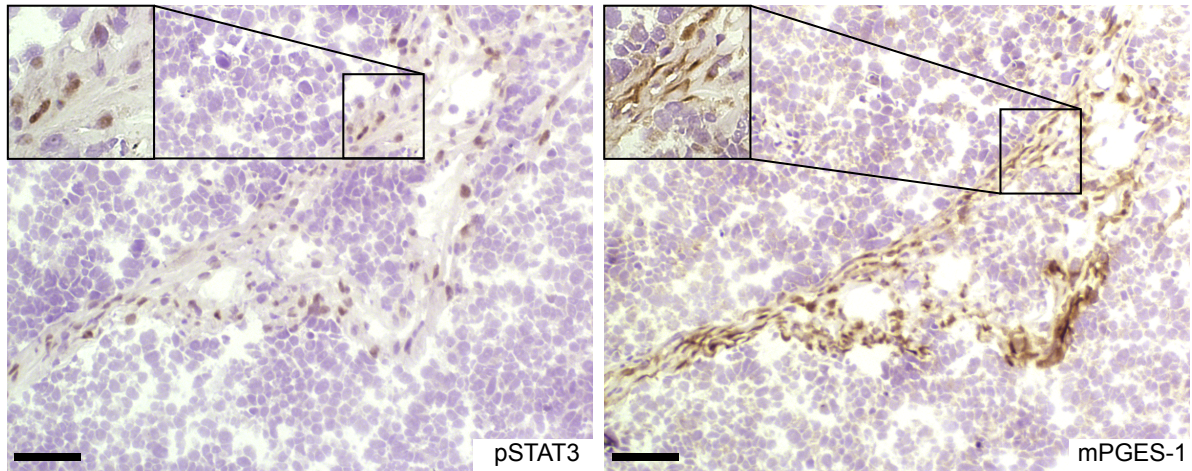

### tgTH-MYCN<sup>+/+</sup>

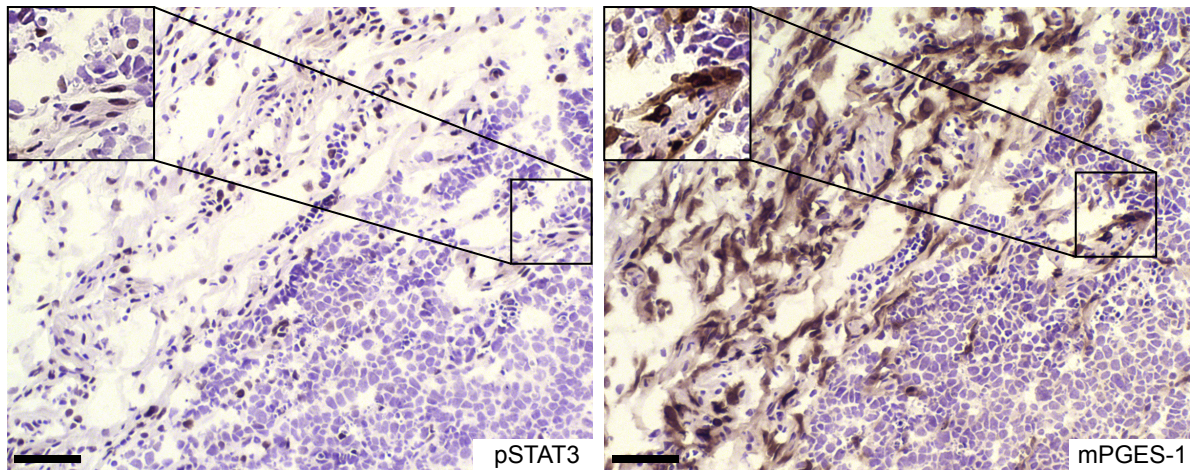

**Figure S1.** Expression of phosphorylated STAT3 (pSTAT3) and mPGES-1 in the tumor stroma of neuroblastoma mouse models. Representative images from immunohistochemical staining of mPGES-1 and pSTAT3 (DAB, brown staining) in consecutive sections from xenograft tumors generated from an 11q-deleted neuroblastoma cell line (SK-N-AS) and MYCN-driven transgenic neuroblastoma model (tgTH-MYCN). Sections were counterstained with Mayer's hematoxylin (blue staining). Scale bars indicate 100  $\mu$ m.

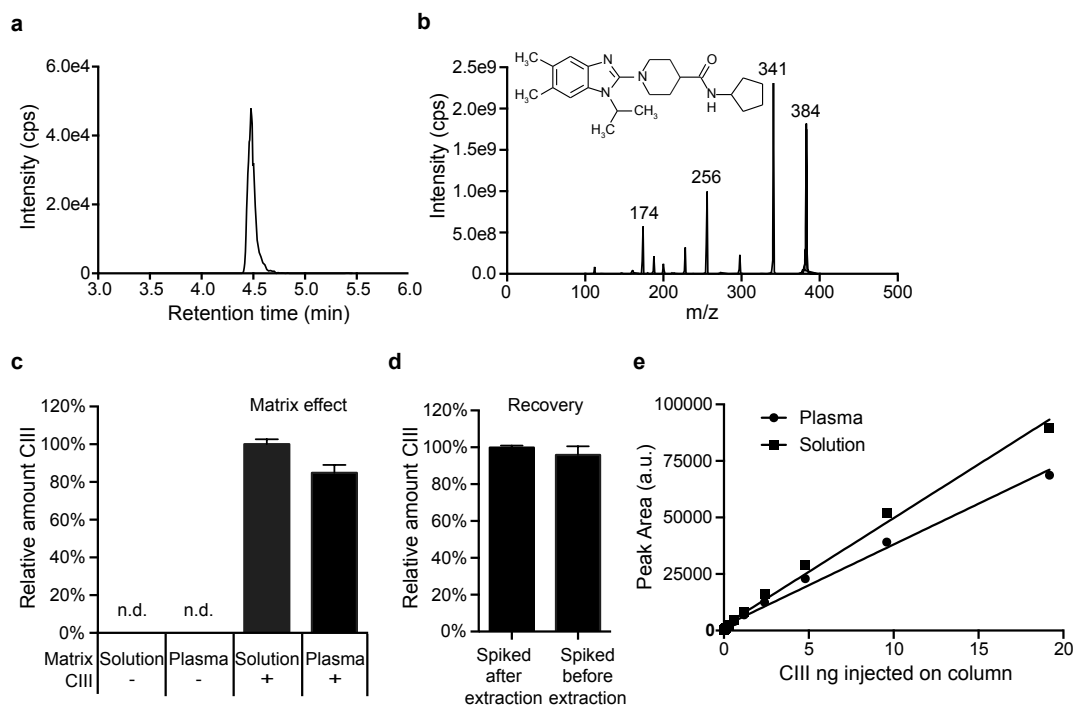

**Figure S2.** A targeted LC-MS/MS method for CIII detection was developed and validated in plasma. (a) Representative multiple reaction monitoring (MRM) chromatogram for CIII ( $m/z$  384 > 341) spiked in plasma. Intensity is measured as counts per second (cps). (b) Mass spectrum showing the fragmentation pattern of CIII (insertion). (c) The matrix effect was determined by spiking CIII in plasma sample after extraction. Minor signal suppression was observed in plasma ( $88 \pm 1\%$ , mean  $\pm$  SEM,  $n = 6$ ). (d) Recovery was determined by spiking CIII in plasma samples before or after extraction. We found close to full recovery of CIII in plasma ( $96 \pm 5\%$ ,  $n = 6$ ). (e) Our LC-MS/MS method for CIII quantification gave good linearity in both plasma ( $R^2 = 0.98$ ) and in solution ( $R^2 = 0.99$ ) for the dynamic range of 0.1-20 ng injected on column. The limit of quantification (signal-to-noise > 10) in solution was 4 pg injected on column.

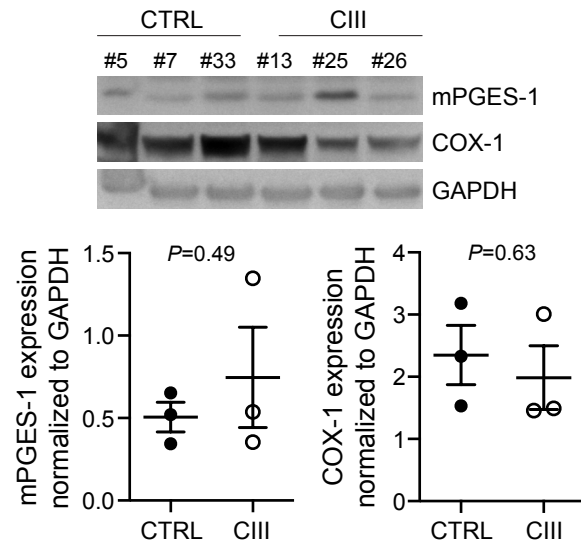

**Figure S3.** Expression of mPGES-1 and COX-1 in xenograft tumors. Western blot analysis of mPGES-1 and COX-1 as well as the housekeeping protein GAPDH in neuroblastoma xenograft tumors from CIII treated mice (mice number (#) 13, 25 and 26) and untreated mice (# 5, 7 and 33). Intensity of bands corresponding to mPGES-1 and COX-1 were quantified and normalized to the band corresponding to GAPDH using Image Lab software.

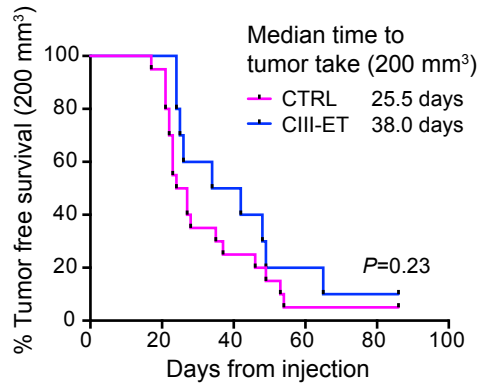

**Figure S4.** Effect of mPGES-1 inhibition with CIII on xenograft tumor development. Kaplan-Meier analysis of tumor development comparing tumor free (< 200 mm<sup>3</sup>) survival probability from tumor cell injection, of CIII treated mice (CIII-ET) or untreated mice (CTRL), see Figure 4a for experimental set up. Median time to tumor take in CIII-ET was 38 days compared to 25.5 days for CTRL ( $P = 0.2$ , Log-rank test (Mantel-Cox)).

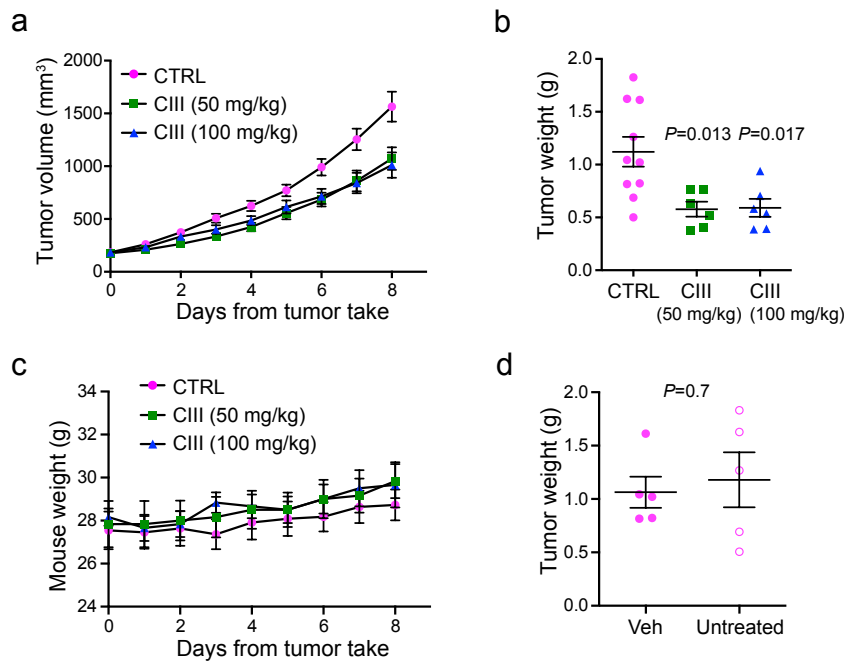

**Figure S5.** Investigation of CIII dose and anti-tumor effects in the xenograft model. Mice were injected with an 11q-deleted cell line (SK-N-AS,  $10^7$  cells,  $n = 22$ ). At tumor take ( $150 \text{ mm}^3$ ) mice were randomized to CIII treatment at different doses, vehicle control or left untreated ( $n = 10$ , CTRL). The mPGES-1 inhibitor CIII was administered with daily intraperitoneal injections for 8 days. Two doses of CIII were tested,  $50 \text{ mg/kg}$  ( $n = 6$ ) and  $100 \text{ mg/kg}$  ( $n = 6$ ). (a) Data is represented as mean tumor volume (calculated as  $(\text{width})^2 \times \text{length} \times 0.44 \pm \text{SEM}$ ). (b) Weight of tumors at the day of sacrifice (8 days post tumor take,  $P = 0.013$  and  $P = 0.017$  for CIII  $50 \text{ mg/kg}$  and CIII  $100 \text{ mg/kg}$  respectively compared to CTRL). (c) Weight of mice during treatment represented as mean weight  $\pm \text{SEM}$ . (d) Tumor weight of CTRL mice comparing vehicle treated mice ( $n = 5$ ) and untreated mice ( $n = 5$ ). Data represented as mean  $\pm \text{SEM}$ ,  $P = 0.7$ , unpaired t-test.

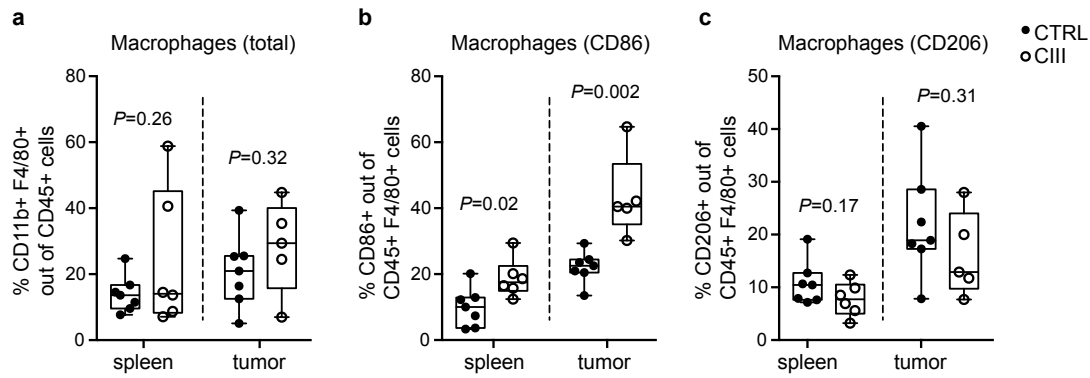

**Figure S6.** Macrophage polarization in transgenic mice treated with CIII. Flow cytometry analysis of macrophage polarization markers in F4/80+CD45+ population of cells in tumors and spleen from untreated (CTRL) and CIII treated (CIII) tgTH-*MYCN* mice. (a) Percentage of CD45+CD11b+F4/80+ cells representing total population of macrophages in spleen and tumor. (b) CD45+F4/80+CD86+ cells corresponding to M1 polarized macrophages ( $P = 0.02$  and  $P = 0.002$  for CIII compared to CTRL in spleen and tumors respectively, unpaired t-test). (c) CD45+F4/80+CD206+ M2 macrophages in spleen and tumor. Data is presented as a Box and whiskers plot showing minimum to maximum range and each mouse as an individual data point.

**Table S1** Antibodies used for immunohistochemical analysis

| <b>Antigen</b> | <b>Antibody ID</b>                                       | <b>Dilution</b> |
|----------------|----------------------------------------------------------|-----------------|
| COX-1          | Cayman Chemical Cat# 160109, RRID:AB_10077936            | 1:3000          |
| COX-2          | Cayman Chemical Cat# 160126, RRID:AB_10079419            | 1:400           |
| mPGES-1        | In house (Westman et al., 2004)                          | 1:5000          |
| EP1            | Cayman Chemical Cat# 101740, RRID:AB_10079426            | 1:200           |
| EP2            | Cayman Chemical Cat# 101750, RRID:AB_10078697            | 1:200           |
| EP3            | Cayman Chemical Cat# 101760, RRID:AB_10077931            | 1:200           |
| EP4            | Cayman Chemical Cat# 101775, RRID:AB_10077932            | 1:200           |
| GD2            | Millipore Cat# MAB2052, RRID:AB_94520                    | 1:15000         |
| PDGFR $\beta$  | Cell Signaling Technology Cat# 3175, RRID:AB_2162494     | 1:100           |
| PDGFR $\beta$  | Thermo Fisher Scientific Cat# 14-1402-82, RRID:AB_467493 | 1:500           |
| IL-1RI         | R&D Systems Cat# AF771, RRID:AB_355587                   | 1:20            |
| pSTAT3         | Cell Signaling Technology Cat# 9145, RRID:AB_2491009     | 1:200           |
| Ki-67          | Lab Vision Cat# RM-9106-S1, RRID:AB_149792               | 1:500           |
| CD31           | BD Biosciences Cat# 550274, RRID:AB_393571               | 1:400           |
| CD206          | BioLegend Cat# 141701, RRID:AB_10900263                  | 1:200           |

**Table S2** Antibodies used for FACS analysis

| <b>Antigen</b> | <b>Antibody ID</b>                      | <b>Fluorochrome</b> |
|----------------|-----------------------------------------|---------------------|
| CD11b          | BioLegend Cat# 101212, RRID:AB_312795   | APC                 |
| CD45           | BioLegend Cat# 103111, RRID:AB_312976   | APC                 |
| CD45           | BioLegend Cat# 103129, RRID:AB_893343   | PerCP               |
| CD45           | BioLegend Cat# 103138, RRID:AB_2563061  | Pacific Orange      |
| CD86           | BioLegend Cat# 105109, RRID:AB_313162   | FITC                |
| CD206          | BioLegend Cat# 141703, RRID:AB_10900988 | FITC                |
| F4/80          | BioLegend Cat# 123110, RRID:AB_893486   | PE                  |

Westman, M., Korotkova, M., af Klint, E., Stark, A., Audoly, L.P., Klareskog, L., *et al.* (2004). Expression of microsomal prostaglandin E synthase 1 in rheumatoid arthritis synovium. *Arthritis Rheum* 50(6), 1774-1780.
